# Supplementary material
Source: publisher figshare collection journal article supplement (https://tandf.figshare.com/ndownloader/files/15341651)
Supplement: Supplementary file 1 [file 15341651]

**Supplementary information**

**Table 2. p-value obtained of ANOVA test to soils (95% confidence)**

| **Factor** | **HgTOT** | **HgSOL** | **HgELEM** | **HgINTER** | **HgFE** | **HgORG** | **HgRES** |
| --- | --- | --- | --- | --- | --- | --- | --- |
| T | <0.0001 | | | | | | |
| S | **0.6496** | **0.9945** | <0.0001 | | 0.0016 | **0.0838** | **0.0775** |
| Tr | 1 | | | | | | |
| Sa | 1 | | | | | | |
| T x S | 0.0016 | <0.0001 | | | | | |
| T x Tr | 0.0168 | <0.0001 | **0.0540** | 0.0422 | **0.1324** | **0.1356** | 0.0087 |
| T x Sa | <0.0001 | | 0.0003 | <0.0001 | | | **0.1909** |
| S x Tr | 1 | | | | | | |
| S x Sa | 1 | | | | | | |
| Tr x Sa | 1 | | | | | | |
| T x S x Tr | 0.0003 | **0.3595** | **03292** | **0.6713** | **0.4460** | **0.8050** | **0.2382** |
| T x S x Sa | 0.0004 | <0.0001 | 0.0048 | **0.9028** | **0.1839** | **0.0871** | <0.0001 |
| S x Tr x Sa | **0.0971** | **0.1799** | **0.6163** | **0.6717** | **0.4123** | **0.3196** | **0.0556** |
| T x Tr x Sa | 0.0023 | 0.0412 | 0.0005 | **0.9988** | **0.1130** | **0.1249** | **0.0878** |

**T, time; S, soil; Tr, Treatment; Sa, Sample**

**Table 4. p-value obtained of ANOVA test to plants (95% confidence)**

| **Factor** | **Hg in leaves** | **Hg in root** |
| --- | --- | --- |
| T | 0.0725 | No exist |
| S | 0.5805 | 0.9225 |
| Tr | 0.7393 | 0.4968 |
| T x S | 0.5593 | 0.5457 |
| T x Tr | 0.3885 | No exist |
| S x Tr | 0.6078 | No exist |
| T x S x Tr | 0.6993 | No exist |

***T, time; S, soil; Tr, treatment**
